# Supplementary material
Source: PubMed Central journal article supplement (PMC5808399)
Supplement: NIHMS924335-supplement-1.pdf [file NIHMS924335-supplement-1.pdf]

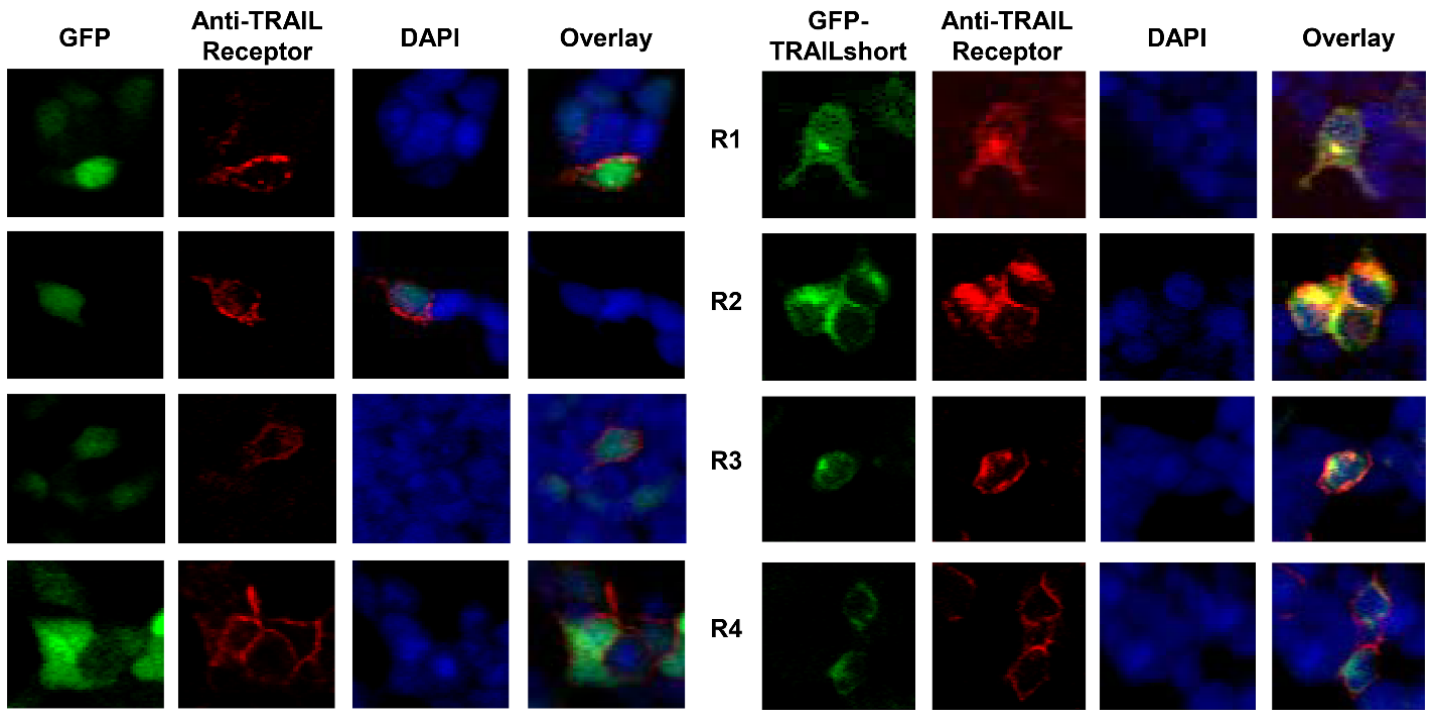

Figure S2. *TRAILshort* colocalizes with *TRAIL R1* and *TRAIL R2*, and less so with *TRAIL R3* and *TRAIL R4*

293T cells were transfected with GFP (left) or *TRAILshort* (right) and either *TRAIL R1*, *R2*, *R3* or *R4*. After transfection, cells were surfaced stained with the appropriate anti-*TRAIL* receptor antibody (conjugated to AlexaFluor 594) and colocalization determined by confocal microscopy.
